# Supplementary material for: Fine-Mapping Nicotine Resistance Loci inDrosophilaUsing a Multiparent Advanced Generation Inter-Cross Population
Source: Oxford University Press journal article supplement (doi:10.1534/genetics.114.162107), 2014-09-01
Supplement: genetics.114.162107-3.pdf [file genetics.114.162107-3.pdf]

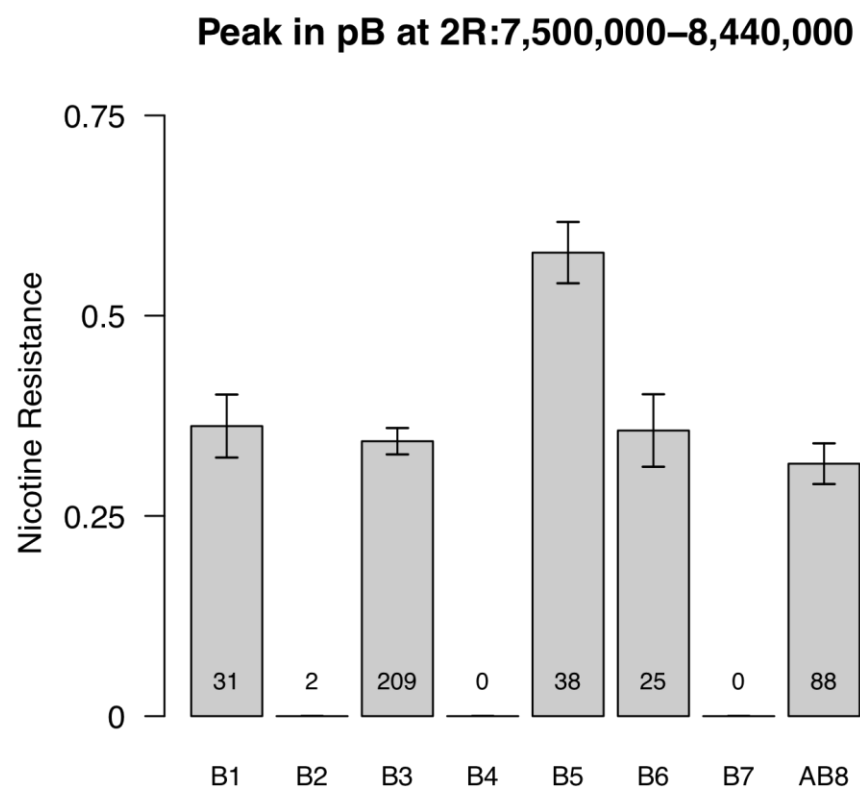

**Figure S4** Founder haplotype means and 1-SDs at the pB-specific peak at position 7,500,000-8,440,000 on chromosome 2R. This interval harbors P450 gene *Cyp6g1*. The number of RILs for which we confidently assign a founder genotype (probability > 0.95) is listed at the bottom of each bar, and only founder means associated with at least 5 observations are presented.
