# Supplementary material for: Fine-Mapping Nicotine Resistance Loci inDrosophilaUsing a Multiparent Advanced Generation Inter-Cross Population
Source: Oxford University Press journal article supplement (doi:10.1534/genetics.114.162107), 2014-09-01
Supplement: genetics.114.162107-4.pdf [file genetics.114.162107-4.pdf]

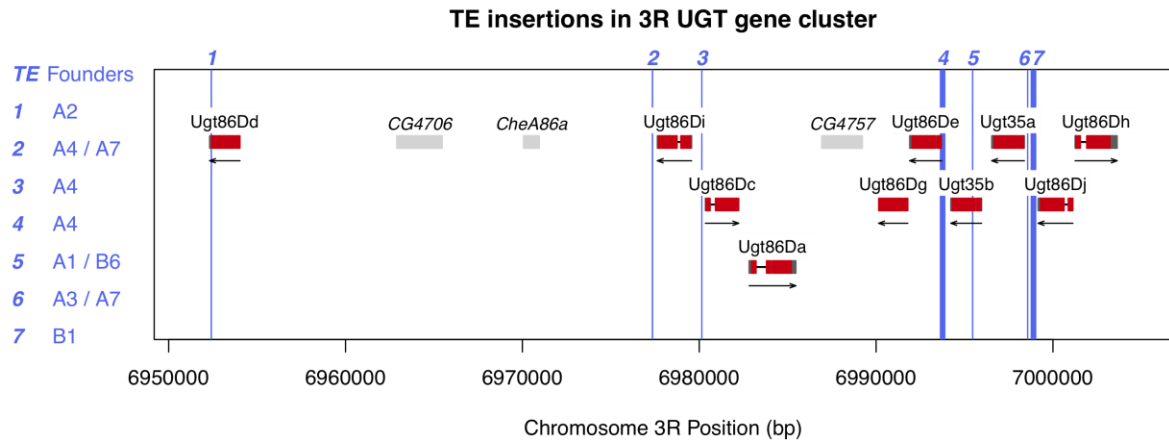

**Figure S3** Positions of transposable elements (TEs) in or near the UGT genes implicated in Q4. The gene models for each of the 10 UGT genes are presented as red boxes (protein-coding regions) and dark gray boxes (untranslated regions), with arrows beneath the gene models showing the direction of transcription. The positions of other genes in the region of Q4 harboring UGT genes are presented as light gray boxes. The vertical blue bars are the positions of seven TEs that are either within, or within 1-kb of the start or end of, UGT genes (data taken from Supplementary Table 4 from Cridland *et al.* 2013) with the width of the bars representing ambiguity in the insertion position of the element. To the left of the plot are the founders that the elements are inserted into.
