# Supplementary material for: Fine-Mapping Nicotine Resistance Loci inDrosophilaUsing a Multiparent Advanced Generation Inter-Cross Population
Source: Oxford University Press journal article supplement (doi:10.1534/genetics.114.162107), 2014-09-01
Supplement: genetics.114.162107-5.pdf [file genetics.114.162107-5.pdf]

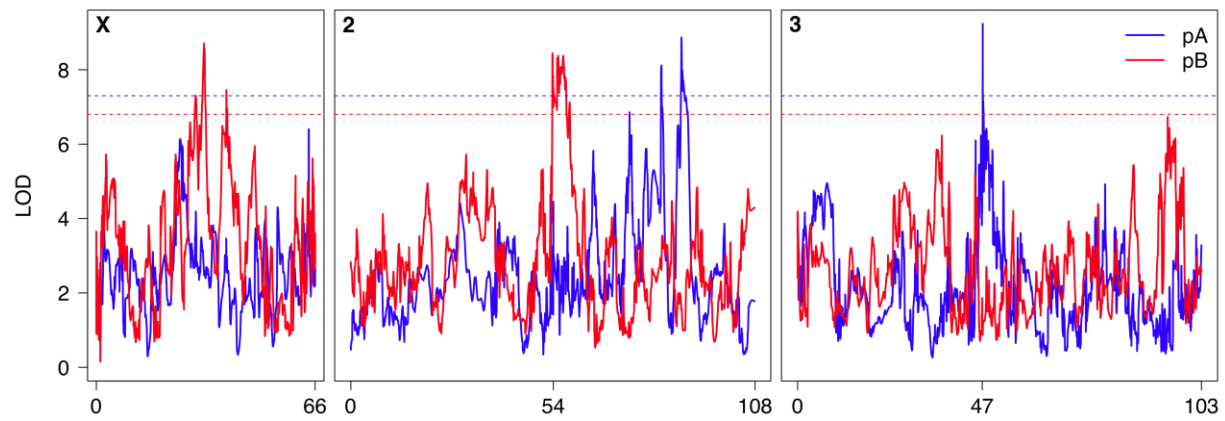

**Figure S1** Genome scan for QTL contributing to larva-to-adult viability on control media. Solid curves are the scans for the pA (blue) and pB (red) data, and the horizontal dotted lines represent the genomewide 5% permutation threshold (LOD = 7.3 for pA and 6.8 for pB). Genetic distances along the chromosomes are indicated along the x-axis. The centromeres are at positions 54 and 47 on chromosomes 2 and 3, respectively. QTL identified in this scan are described in Table S2.
