# Supplementary material for: Fine-Mapping Nicotine Resistance Loci inDrosophilaUsing a Multiparent Advanced Generation Inter-Cross Population
Source: Oxford University Press journal article supplement (doi:10.1534/genetics.114.162107), 2014-09-01
Supplement: genetics.114.162107-6.pdf [file genetics.114.162107-6.pdf]

**Table S2 Details of QTL mapped for larva-to-adult viability on control food**

| Name                 | LOD score | Chr   | Peak cM<br>(2-LOD CI) <sup>a</sup> | Peak Mb<br>(2-LOD CI) <sup>a</sup> | Number of<br>genes <sup>b</sup> |
|----------------------|-----------|-------|------------------------------------|------------------------------------|---------------------------------|
| i (pA)               | 8.1       | 2R    | 82.8 (82.6–83.4)                   | 13.44 (13.38–13.60)                | 50                              |
| ii (pA) <sup>c</sup> | 8.9       | 2R    | 88.2 (88.0–89.9)                   | 15.26 (15.19–15.86)                | 75                              |
| iii (pA)             | 9.2       | 3R    | 47.2 (47.2–47.3)                   | 1.30 (1.21–1.47)                   | 50                              |
| iv (pB) <sup>d</sup> | 8.7       | X     | 32.6 (31.8–33.2)                   | 10.73 (10.52–10.89)                | 37                              |
| v (pB) <sup>d</sup>  | 7.5       | X     | 39.4 (37.9–40.7)                   | 12.44 (12.10–12.73)                | 41                              |
| vi (pB) <sup>d</sup> | 8.4       | 2L-2R | 53.8 (53.7–58.5)                   | 2L:19.76 (2L:19.59–2R:4.44)        | 733                             |

<sup>a</sup> 2-LOD CI indicates the 2-LOD support interval of the QTL.

<sup>b</sup> The number of protein-coding genes in the 2-LOD support interval.

<sup>c</sup> The location of this control viability QTL overlaps that of Q3 (Table 1), a QTL contributing to viability on nicotine food.

<sup>d</sup> Given the relatively small number of RILs phenotyped for population pB, coupled with the low level of within-line replication we recommend caution in interpreting QTL mapped in pB.
